# Supplementary material for: Modulation of Metabolome and Overall Perception of Pea Protein-Based Gels Fermented with Various Synthetic Microbial Consortia
Source: MDPI journal article supplement (doi:10.3390/foods11081146), 2022-04-15
Supplement: s1 [file s1]

**Table S1.** Composition of experimental synthetic communities of strains

| VEGAN | MEGAN A | MEGAN V | Strains                                    | Origin                | Source      |
|-------|---------|---------|--------------------------------------------|-----------------------|-------------|
|       | X       |         | <i>Kluyveromyces lactis</i> , 3550         | Dairy products        | UMR Sayfood |
|       | X       |         | <i>Lactococcus lactis</i> , S3             | Dairy products        | UMR Sayfood |
| X     | X       |         | <i>Lactobacillus rhamnosus</i> , CNRZ212   | Dairy products        | UMR Sayfood |
| X     | X       |         | <i>Diutina catenulata</i> , Exfcom LD      | Dairy products        | UMR Sayfood |
| X     | X       |         | <i>Geotrichum candidum</i> , ATCC 204307   | Dairy products        | ATCC        |
| X     |         |         | <i>Leuconostoc lactis</i> , NCW1           | Dairy products        | UMR Sayfood |
| X     |         |         | <i>Hafnia alvei</i> , GB001                | Dairy products        | UMR Sayfood |
| X     |         |         | <i>Brevibacterium antiquum</i> , CNRZ 918  | Dairy products        | UMR Sayfood |
| X     |         |         | <i>Brevibacterium casei</i> , CIP102111    | Dairy products        | CIP         |
| X     |         |         | <i>Yarrowia lipolytica</i> , CLIB 183      | Dairy products        | CLIB        |
|       |         | X       | <i>Lactococcus lactis</i> , NCDO 2118      | Legumes               | NCDO        |
|       |         | X       | <i>Lactobacillus rhamnosus</i> , LMG 10772 | wine                  | BCCM/LMG    |
|       |         | X       | <i>Diutina catenulata</i> , CLIB 1179      | Tree                  | CLIB        |
|       |         | X       | <i>Geotrichum candidum</i> , CLIB 1154     | Cacao                 | CLIB        |
|       |         | X       | <i>Kluyveromyces lactis</i> , NCYC 2597    | Fermented maize dough | NCYC        |

**TableS2.** Volatile compounds present in non-fermented and fermented pea and mixed gels. Comparison of quantities (peak area) for three consortia VEGAN, MEGAN-A and MEGAN-V. Within a table line, peak areas with different superscript letters are significantly different ( $\alpha \leq 0.05$ ). Green letters refer to pea gels. Blue letters refer to mixed gels.

|                         |                                                     |            | Control samples<br>(non-fermented) |                       | Fermented samples     |                       |                       |                       |
|-------------------------|-----------------------------------------------------|------------|------------------------------------|-----------------------|-----------------------|-----------------------|-----------------------|-----------------------|
|                         |                                                     |            |                                    |                       | VEGAN                 | MEGAN-A               | MEGAN-V               |                       |
| Volatile compounds      | Sensory descriptors from literature<br>(Flavornet)* | CAS number | Pea                                | Mixed                 | Pea                   | Mixed                 | Pea                   | Mixed                 |
| Alcools                 |                                                     |            |                                    |                       |                       |                       |                       |                       |
| Ethanol                 | sweet                                               | 64-17-5    | nd <sup>b</sup>                    | 8,05E+06 <sup>c</sup> | nd <sup>b</sup>       | 1,11E+08 <sup>a</sup> | 1,32E+07 <sup>a</sup> | 2,55E+07 <sup>b</sup> |
| 2-methylpropan-1-ol     | wine, solvent, bitter                               | 78-83-1    | nd <sup>b</sup>                    | nd                    | nd <sup>b</sup>       | nd <sup>b</sup>       | 2,23E+06 <sup>a</sup> | 3,86E+06 <sup>a</sup> |
| 2-methylbutan-1-ol      | wine, onion                                         | 137-32-6   | nd <sup>b</sup>                    | nd                    | 7,09E+06 <sup>a</sup> | nd                    | nd <sup>b</sup>       | nd                    |
| pent-1-en-3-ol          | butter, pungent                                     | 616-25-1   | 1,10E+06 <sup>a</sup>              | 8,58E+05 <sup>a</sup> | nd <sup>b</sup>       | nd <sup>b</sup>       | nd <sup>b</sup>       | nd <sup>b</sup>       |
| propan-1-ol             | alcohol, pungent                                    | 71-23-8    | nd <sup>b</sup>                    | nd                    | 2,28E+06 <sup>a</sup> | nd                    | nd <sup>b</sup>       | nd                    |
| propan-2-ol             | alcohol, pungent                                    | 67-63-0    | 5,34E+06 <sup>a</sup>              | 1,10E+07 <sup>a</sup> | 3,36E+06 <sup>b</sup> | nd <sup>b</sup>       | 2,71E+06 <sup>b</sup> | 1,25E+07 <sup>a</sup> |
| Aldehydes_Green         |                                                     |            |                                    |                       |                       |                       |                       |                       |
| hexanal                 | grass, tallow, fat                                  | 66-25-1    | 1,96E+07 <sup>a</sup>              | 1,03E+07 <sup>a</sup> | 1,54E+06 <sup>b</sup> | 1,10E+06 <sup>c</sup> | 3,03E+06 <sup>b</sup> | 4,85E+06 <sup>b</sup> |
| propanal                | solvent, pungent                                    | 123-38-6   | 5,26E+06 <sup>a</sup>              | 4,76E+06 <sup>a</sup> | 3,69E+05 <sup>b</sup> | nd <sup>b</sup>       | nd <sup>b</sup>       | nd <sup>b</sup>       |
| butanal                 | pungent, green                                      | 123-72-8   | 2,33E+06 <sup>a</sup>              | 1,11E+06 <sup>a</sup> | nd <sup>b</sup>       | nd <sup>b</sup>       | nd <sup>b</sup>       | nd <sup>b</sup>       |
| Aldehydes_Other         |                                                     |            |                                    |                       |                       |                       |                       |                       |
| acetaldehyde            | pungent, ether                                      | 75-07-0    | 1,51E+06 <sup>a</sup>              | nd <sup>b</sup>       | nd <sup>b</sup>       | 3,62E+0 <sup>a</sup>  | nd <sup>b</sup>       | nd <sup>b</sup>       |
| 2-methylpropanal        | pungent, malt                                       | 78-84-2    | nd <sup>b</sup>                    | nd <sup>c</sup>       | nd <sup>b</sup>       | 1,69E+07 <sup>b</sup> | 1,97E+07 <sup>a</sup> | 2,80E+07 <sup>a</sup> |
| 3-methylbutanal         | malt                                                | 590-86-3   | 2,89E+06 <sup>a</sup>              | 1,85E+06 <sup>b</sup> | 2,56E+07 <sup>b</sup> | 1,26E+07 <sup>a</sup> | 8,67E+06 <sup>a</sup> | 1,39E+07 <sup>a</sup> |
| 2-methylbutanal         | cocoa, almond                                       | 96-17-3    | 1,46E+06 <sup>a</sup>              | 7,11E+05 <sup>c</sup> | 4,83E+06 <sup>b</sup> | 2,03E+06 <sup>a</sup> | 3,52E+05 <sup>b</sup> | 7,33E+05 <sup>b</sup> |
| (2E,4E)-hexa-2,4-dienal | green, fruity,melon,fresh                           | 142-83-6   | nd                                 | nd <sup>b</sup>       | nd                    | 2,09E+06 <sup>a</sup> | nd                    | nd <sup>b</sup>       |
| pentanal                | fried                                               | 431302-4   | 9,95E+06 <sup>a</sup>              | nd                    | nd <sup>b</sup>       | nd                    | nd <sup>b</sup>       | nd                    |
| Aromatic hydrocarbons   |                                                     |            |                                    |                       |                       |                       |                       |                       |
| 2-methyl furan          | chocolate                                           | 534-22-5   | nd                                 | 7,29E+05 <sup>a</sup> | nd                    | 4,32E+05 <sup>b</sup> | nd                    | 1,15E+06 <sup>c</sup> |
| Toluene                 | paint                                               | 108-88-3   | 1,73E+06 <sup>a</sup>              | nd                    | nd <sup>b</sup>       | nd                    | nd <sup>b</sup>       | nd                    |
| 2-pentylfuran           | green bean, butter                                  | 3777-69-3  | 1,79E+06 <sup>a</sup>              | nd                    | 6,06E+05 <sup>b</sup> | nd                    | nd <sup>c</sup>       | nd                    |
| 2-ethylfuran            | sweet burnt earthy malty                            | 3208-16-0  | 4,01E+06 <sup>a</sup>              | 1,79E+06 <sup>a</sup> | 1,21E+06 <sup>b</sup> | nd <sup>b</sup>       | 2,96E+06 <sup>a</sup> | 2,56E+06 <sup>a</sup> |
| Sulphur compounds       |                                                     |            |                                    |                       |                       |                       |                       |                       |
| methyldisulfanylmethane | onion, cabbage, putrid                              | 624-92-0   | 3,54E+06 <sup>b</sup>              | 7,11E+05 <sup>a</sup> | 5,27E+06 <sup>a</sup> | 6,13E+05 <sup>a</sup> | nd <sup>c</sup>       | 7,85E+05 <sup>a</sup> |

|                               |                                                  |            | Control samples       |                       | Fermented samples     |                       |                       |                       |
|-------------------------------|--------------------------------------------------|------------|-----------------------|-----------------------|-----------------------|-----------------------|-----------------------|-----------------------|
|                               |                                                  |            |                       |                       | VEGAN                 | MEGAN-A               | MEGAN-V               |                       |
| Volatile compounds            | Sensory descriptors from literature (Flavornet)* | CAS number | Pea                   | Mixed                 | Pea                   | Mixed                 | Pea                   | Mixed                 |
| Alkanes                       |                                                  |            |                       |                       |                       |                       |                       |                       |
| pentane                       | alkane                                           | 109-66-0   | 5,60E+06 <sup>b</sup> | 2,32E+06 <sup>b</sup> | 4,58E+06 <sup>b</sup> | 5,39E+06 <sup>a</sup> | 1,15E+07 <sup>a</sup> | 6,20E+06 <sup>a</sup> |
| hexane                        | alkane                                           | 110-54-3   | 4,76E+06 <sup>b</sup> | 3,70E+06 <sup>a</sup> | 6,41E+06 <sup>a</sup> | 1,24E+06 <sup>b</sup> | 2,00E+06 <sup>c</sup> | 3,69E+06 <sup>b</sup> |
| heptane                       | alkane                                           | 142-82-5   | 1,21E+06 <sup>b</sup> | nd <sup>b</sup>       | nd <sup>c</sup>       | nd <sup>b</sup>       | 2,81E+06 <sup>a</sup> | 3,15E+06 <sup>a</sup> |
| Octane                        | alkane                                           | 111-65-9   | 1,81E+06 <sup>a</sup> | 2,58E+06 <sup>b</sup> | 2,80E+06 <sup>a</sup> | 1,88E+06 <sup>b</sup> | nd <sup>b</sup>       | 5,51E+06 <sup>a</sup> |
| nonane                        | alkane                                           | 111-84-2   | nd <sup>b</sup>       | nd                    | 2,41E+05 <sup>a</sup> | nd                    | nd <sup>b</sup>       | nd                    |
| Alkenes                       |                                                  |            |                       |                       |                       |                       |                       |                       |
| hex-1-ene                     | not identified                                   | 592-76-7   | nd                    | nd <sup>b</sup>       | nd                    | nd <sup>b</sup>       | nd                    | 8,92E05 <sup>a</sup>  |
| 2-methylbuta-1,3-diene        | not identified                                   | 78-79-5    | nd                    | nd <sup>b</sup>       | nd                    | 2,68E+05 <sup>a</sup> | nd                    | nd <sup>b</sup>       |
| Ketones                       |                                                  |            |                       |                       |                       |                       |                       |                       |
| butan-2-one                   | ether                                            | 78-93-3    | 7,31E+06 <sup>a</sup> | 6,99E+06 <sup>a</sup> | 2,42E+06 <sup>b</sup> | 1,91E+06 <sup>c</sup> | 2,79E+06 <sup>b</sup> | 4,84E+06 <sup>b</sup> |
| propan-2-one                  | ether                                            | 67-64-1    | 3,40E+07 <sup>a</sup> | 4,03E+07 <sup>a</sup> | 1,83E+07 <sup>b</sup> | nd <sup>b</sup>       | nd <sup>c</sup>       | nd <sup>b</sup>       |
| pentan-2-one                  | ether, fruit                                     | 107-87-9   | nd <sup>b</sup>       | 5,96E+06 <sup>a</sup> | nd <sup>b</sup>       | nd <sup>b</sup>       | 6,91E+0 <sup>a</sup>  | nd <sup>b</sup>       |
| heptan-2-one                  | soap                                             | 110-43-0   | 3,76E+06 <sup>a</sup> | 1,97E+06 <sup>a</sup> | nd <sup>b</sup>       | 6,11E+05 <sup>b</sup> | nd <sup>b</sup>       | nd <sup>c</sup>       |
| butane-2,3-dione              | butter creamy caramel                            | 431-03-8   | nd                    | nd <sup>c</sup>       | nd                    | 1,95E+07 <sup>b</sup> | nd                    | 6,99E+07 <sup>a</sup> |
| Esters                        |                                                  |            |                       |                       |                       |                       |                       |                       |
| ethyl acetate                 | pineapple                                        | 141-78-6   | nd <sup>b</sup>       | nd <sup>b</sup>       | nd <sup>b</sup>       | 2,88E+06 <sup>a</sup> | 1,10E+06 <sup>a</sup> | 1,62E+06 <sup>a</sup> |
| methyl acetate                | fruity, banana, sweet                            | 79-20-9    | 1,90E+06 <sup>a</sup> | nd                    | nd <sup>b</sup>       | nd                    | nd <sup>b</sup>       | nd                    |
| ethyl-2-methylpropanoate      | sour, acid, fruity, berry                        | 97-62-1    | nd <sup>b</sup>       | nd <sup>b</sup>       | nd <sup>b</sup>       | nd <sup>b</sup>       | 1,92E+06 <sup>a</sup> | 7,33E+05 <sup>a</sup> |
| ethyl 3-methylbutanoate       | fruity,pineapple                                 | 108-64-5   | nd <sup>b</sup>       | nd                    | nd <sup>b</sup>       | nd                    | 2,60E+06 <sup>a</sup> | nd                    |
| Acid                          |                                                  |            |                       |                       |                       |                       |                       |                       |
| (E)-2-methylpent-2-enoic acid | fruity, acidic,berry                             | 3142-72-1  | nd <sup>b</sup>       | nd                    | nd <sup>b</sup>       | nd                    | 3,82E+06 <sup>a</sup> | nd                    |

\* <https://www.flavornet.org/flavornet.html>
